# Supplementary material for: Cumulative stressors reduce the self‐regulating capacity of coastal ecosystems
Source: PubMed Central journal article supplement — Ecol Appl. 2020 Oct 29;31(1):e02223. doi: 10.1002/eap.2223 (PMC7816261; doi:10.1002/eap.2223), 2020-10-29
Supplement: EAP-31-e02223-s001.pdf [file EAP-31-e02223-s001.pdf]

**Supporting Information.** Thrush, S.F., J.E. Hewitt, R.V. Gladstone-Gallagher, C. Savage, C. Lundquist, T. O’Meara, A. Vieillard, J.R. Hillman, S. Mangan, E.J. Douglas, D.E. Clark, A.M Lohrer, and C. Pilditch. 2020. Cumulative stressors reduced the self-regulating capacity of coastal ecosystems. *Ecological Applications*.

**Appendix S1**

**Table S1.** Description of the relationships between variables used to populate the Ecosystem Interaction Network in Figure 1.

| <b>Variable</b>                                | <b>Effected variables</b> | <b>Relationship</b>                           | <b>Reference</b>                                                                                                                  |
|------------------------------------------------|---------------------------|-----------------------------------------------|-----------------------------------------------------------------------------------------------------------------------------------|
| <b><i>Macomona</i></b><br><b>(&gt;20mm)</b>    | Chl a                     | Grazing, interference with smaller macrofauna | (Thrush et al. 1997, Lelieveld et al. 2003, Volkenborn et al. 2012, Pratt et al. 2014, Van Colen et al. 2015, Woodin et al. 2016) |
|                                                | BOC                       | Respiration, bioirrigation                    |                                                                                                                                   |
|                                                | Organic matter            | Death, excretion                              |                                                                                                                                   |
|                                                | Mud                       | Sediment destabilization                      |                                                                                                                                   |
|                                                | Gravel                    | Shell production                              |                                                                                                                                   |
|                                                | NH <sub>4</sub> flux      | Bioirrigation, excretion                      |                                                                                                                                   |
|                                                | Denitrification           | Bioirrigation, excretion                      |                                                                                                                                   |
| <b><i>Austrovenus</i></b><br><b>(&gt;20mm)</b> | Chl a                     | Bioturbation                                  | (Thrush et al. 2006, Jones et al. 2011, Woodin et al. 2016)                                                                       |
|                                                | BOC                       | Respiration, Benthic-pelagic coupling         |                                                                                                                                   |
|                                                | Organic matter            | Death, Benthic-pelagic coupling               |                                                                                                                                   |
|                                                | Mud                       | Bioturbation, Benthic-pelagic coupling        |                                                                                                                                   |
|                                                | Gravel                    | Bioturbation, Benthic-pelagic coupling        |                                                                                                                                   |
|                                                | NH <sub>4</sub> flux      | Shell production                              |                                                                                                                                   |
|                                                | Denitrification           | Excretion, bioturbation                       |                                                                                                                                   |
| <b>Primary production</b>                      | Chl a                     | Growth                                        |                                                                                                                                   |
|                                                | BOC                       | O <sub>2</sub> Production                     |                                                                                                                                   |

|                                         |                      |                                                                                                  |                                                                                                                    |
|-----------------------------------------|----------------------|--------------------------------------------------------------------------------------------------|--------------------------------------------------------------------------------------------------------------------|
|                                         | NH <sub>4</sub> flux | O <sub>2</sub> production, uptake of nutrients                                                   |                                                                                                                    |
| <b>Benthic Chlorophyll a (Chl a)</b>    | <i>Macomona</i>      | Food resource                                                                                    | (Cahoon et al. 1999, Van de Koppel et al. 2001, Ehrenhauss et al. 2004, Thrush et al. 2006, Van Colen et al. 2013) |
|                                         | <i>Austrovenus</i>   | Food resource                                                                                    |                                                                                                                    |
|                                         | BOC                  | O <sub>2</sub> Production, Respiration                                                           |                                                                                                                    |
|                                         | Organic matter       | Primary production, decomposition                                                                |                                                                                                                    |
|                                         | Mud                  | Binding fine particles, sediment stability                                                       |                                                                                                                    |
|                                         | NH <sub>4</sub> flux | Sediment permeability                                                                            |                                                                                                                    |
|                                         | PAR                  | Sediment stability affects turbidity                                                             |                                                                                                                    |
| <b>Benthic oxygen consumption (BOC)</b> | <i>Macomona</i>      | Hypoxia                                                                                          |                                                                                                                    |
|                                         | Denitrification      | DNRA (Dissimilatory nitrate reduction to ammonium, also known as nitrate/nitrite ammonification) |                                                                                                                    |
| <b>Organic matter</b>                   | Primary production   | Nutrient provision                                                                               | (Knowles 1082 , Ehrenhauss et al. 2004)                                                                            |
|                                         | BOC                  | Oxidation                                                                                        |                                                                                                                    |
|                                         | NH <sub>4</sub> flux | REDOX chemistry                                                                                  |                                                                                                                    |
|                                         | Denitrification      | DNRA, carbon source                                                                              |                                                                                                                    |
| <b>Mud</b>                              | <i>Macomona</i>      | Habitat suitability                                                                              | (Sloth et al. 1995, Huettel and Rusch 2000, Douglas et al. 2018)                                                   |
|                                         | <i>Austrovenus</i>   | Habitat suitability, elevated suspended sediment                                                 |                                                                                                                    |
|                                         | BOC                  | Sediment permeability                                                                            |                                                                                                                    |
|                                         | Organic matter       | Co-occurrence on fine particles                                                                  |                                                                                                                    |
|                                         | Gravel               | Co-related                                                                                       |                                                                                                                    |
|                                         | NH <sub>4</sub> flux | Permeability, particle surface area for microbes                                                 |                                                                                                                    |

|                                                                   |                                                                                                                          |                                                                                                                                                                                                                                                   |                                                                                                               |
|-------------------------------------------------------------------|--------------------------------------------------------------------------------------------------------------------------|---------------------------------------------------------------------------------------------------------------------------------------------------------------------------------------------------------------------------------------------------|---------------------------------------------------------------------------------------------------------------|
|                                                                   | Denitrification<br>Average daily max light (PAR)                                                                         | Permeability, particle surface area for microbes<br>Suspended sediment concentrations                                                                                                                                                             |                                                                                                               |
| <b>Gravel</b>                                                     | <i>Macomona</i><br><i>Austrovenus</i><br>Primary production<br>BOC<br>Mud<br><br>NH <sub>4</sub> flux<br>Denitrification | Habitat suitability<br>Habitat suitability<br>Sediment permeability<br>Permeability, particle surface area for microbes<br>Co-related<br><br>Permeability, particle surface area for microbes<br>Permeability, particle surface area for microbes | (Huettel and Rusch 2000, Hewitt et al. 2005, Cummings et al. 2007, Ellingsen et al. 2007, Hewitt et al. 2009) |
| <b>Temperature</b>                                                | <i>Macomona</i><br><i>Austrovenus</i><br>Chl a<br>BOC<br>NH <sub>4</sub> flux<br>Denitrification                         | Metabolic scaling<br>Metabolic scaling<br>Metabolic scaling<br>Metabolic scaling<br>Metabolic scaling and viscosity effects in water which will alter diffusion rates<br><br>Metabolic scaling                                                    | (Seitzinger 1988, Brown et al. 2004, Wallenstein et al. 2006)                                                 |
| <b>Sediment-water NH<sub>4</sub> flux (NH<sub>4</sub> efflux)</b> | Primary production<br>Denitrification                                                                                    | Nutrient provision<br>Substrate provision                                                                                                                                                                                                         | (Solan et al. 2004)                                                                                           |
| <b>Denitrification</b>                                            | -                                                                                                                        | -                                                                                                                                                                                                                                                 |                                                                                                               |
| <b>Average daily max light (PAR)</b>                              | Primary production                                                                                                       | Photosynthesis                                                                                                                                                                                                                                    |                                                                                                               |

## References

- Brown, J. H., J. F. Gillooly, A. P. Allen, V. M. Savage, and G. B. West. 2004. Toward a metabolic theory of ecology. *Ecology* **85**:1771-1789.
- Cahoon, L. B., J. E. Nearhoof, and C. L. Tilton. 1999. Sediment grain size effect on benthic microalgal biomass in shallow aquatic ecosystems. *Estuaries* **22**:735-741.
- Cummings, V., J. Hewitt, J. Halliday, and G. Mackay. 2007. Optimizing the success of *Austrovenus stutchburyi* restoration: Preliminary investigations in a New Zealand estuary. *Journal of Shellfish Research* **26**:89-100.
- Douglas, E. J., C. A. Pilditch, A. M. Lohrer, C. Savage, L. A. Schipper, and S. F. Thrush. 2018. Sedimentary Environment Influences Ecosystem Response to Nutrient Enrichment. *Estuaries and Coasts* **41**:1994-2008.
- Ehrenhauss, S., U. Witte, F. Janssen, and M. Huettel. 2004. Decomposition of diatoms and nutrient dynamics in permeable North Sea sediments. *Continental Shelf Research* **24**:721-737.
- Ellingsen, K. E., J. E. Hewitt, and S. F. Thrush. 2007. Rare species, habitat diversity and functional redundancy in marine benthos. *Journal of Sea Research* **58**:291-301.
- Hewitt, J. E., M. J. Anderson, S. Kelly, and S. F. Thrush. 2009. Enhancing the ecological significance of contamination guidelines through verification with community analysis. *Environmental Science & Technology* **43**:2118-2123.
- Hewitt, J. E., S. F. Thrush, J. Halliday, and C. Duffy. 2005. The importance of small-scale habitat structure for maintaining beta diversity. *Ecology* **86**:1619-1626.
- Huettel, M., and A. Rusch. 2000. Transport and degradation of phytoplankton in permeable sediment. *Limnology and Oceanography* **45**:534-549.
- Jones, H. F. E., C. A. Pilditch, D. A. Bruesewitz, and A. M. Lohrer. 2011. Sedimentary Environment Influences the Effect of an Infaunal Suspension Feeding Bivalve on Estuarine Ecosystem Function. *PLoS ONE* **6**:e27065.
- Knowles, R. 1982. Denitrification. *Microbiological Reviews* **46**:43-70.
- Lelieveld, S. D., C. A. Pilditch, and M. O. Greene. 2003. Variation in sediment stability and relation to indicators of microbial abundance in the Okura Estuary, New Zealand. *Estuarine Coastal and Shelf Science* **57**:123-136.
- Pratt, D. R., C. A. Pilditch, A. M. Lohrer, S. F. Thrush, and C. Kraan. 2014. Spatial Distributions of Grazing Activity and Microphytobenthos Reveal Scale-Dependent Relationships Across a Sedimentary Gradient. *Estuaries and Coasts*.
- Seitzinger, S. P. 1988. Denitrification in freshwater and coastal marine ecosystems: Ecological and geochemical significance. *Limnology and Oceanography* **33**:702-724.
- Sloth, N. P., B. T. H., H. L. S., N. Risgaard-Petersen, and B. A. Lomstein. 1995. Nitrogen cycling in sediments with different organic loading. *Marine Ecological Progress Series* **116**:163-170.
- Solan, M., B. J. Cardinale, A. L. Downing, K. A. M. Engelhardt, J. L. Ruesink, and D. S. Srivastava. 2004. Extinction and ecosystem function in the marine benthos. *Science* **306**:1177-1180.
- Thrush, S. F., V. J. Cummings, P. K. Dayton, R. Ford, J. Grant, J. E. Hewitt, A. H. Hines, S. M. Lawrie, P. Legendre, B. H. McArdle, R. D. Pridmore, D. C. Schneider, S. J. Turner, R. B. Whitlatch, and M. R. Wilkinson. 1997. Matching the outcome of

- small-scale density manipulation experiments with larger scale patterns: an example of bivalve adult/juvenile interactions. *Journal of Experimental Marine Biology and Ecology* **216**:153-170.
- Thrush, S. F., J. E. Hewitt, M. Gibbs, C. Lundquist, and A. Norkko. 2006. Functional role of large organisms in intertidal communities: Community effects and ecosystem function. *Ecosystems* **9**:1029-1040.
- Van Colen, C., S. F. Thrush, S. Parkes, R. Harris, S. A. Woodin, D. S. Wethey, C. A. Pilditch, J. E. Hewitt, A. M. Lohrer, and M. Vincx. 2015. Bottom-up and top-down mechanisms indirectly mediate interactions between benthic biotic ecosystem components. *Journal of Sea Research* **98**:42-48.
- Van Colen, C., S. F. Thrush, M. Vincx, and T. Ysebaert. 2013. Conditional Responses of Benthic Communities to Interference from an Intertidal Bivalve. *PLoS ONE* **8**.
- Van de Koppel, J., P. M. J. Herman, P. Thoolen, and C. H. R. Heip. 2001. Do alternate stable states occur in natural ecosystems? Evidence from a tidal flat. *Ecology* **82**:3449-3461.
- Volkenborn, N., C. Meile, L. Polerecky, C. A. Pilditch, A. Norkko, J. Norkko, J. E. Hewitt, S. F. Thrush, D. S. Wethey, and S. A. Woodin. 2012. Intermittent bioirrigation and oxygen dynamics in permeable sediments: An experimental and modeling study of three tellinid bivalves. *Journal of Marine Research* **70**:794-823.
- Wallenstein, M. D., D. D. Myrold, M. Firestone, and M. Voytek. 2006. Environmental controls on denitrifying communities and denitrification rates: Insights from molecular methods. *Ecological Applications* **16**:2143-2152.
- Woodin, S. A., N. Volkenborn, C. A. Pilditch, A. M. Lohrer, D. S. Wethey, J. Hewitt, and S. F. Thrush. 2016. Same pattern, different mechanism: Locking onto the role of key species in seafloor ecosystem process. *Scientific Reports* **6**:26678 | DOI: **10.1038/srep26678**.
